# Supplementary material
Source: PubMed Central journal article supplement (PMC5582804)
Supplement: NIHMS893880-supplement-S1.pdf [file NIHMS893880-supplement-S1.pdf]

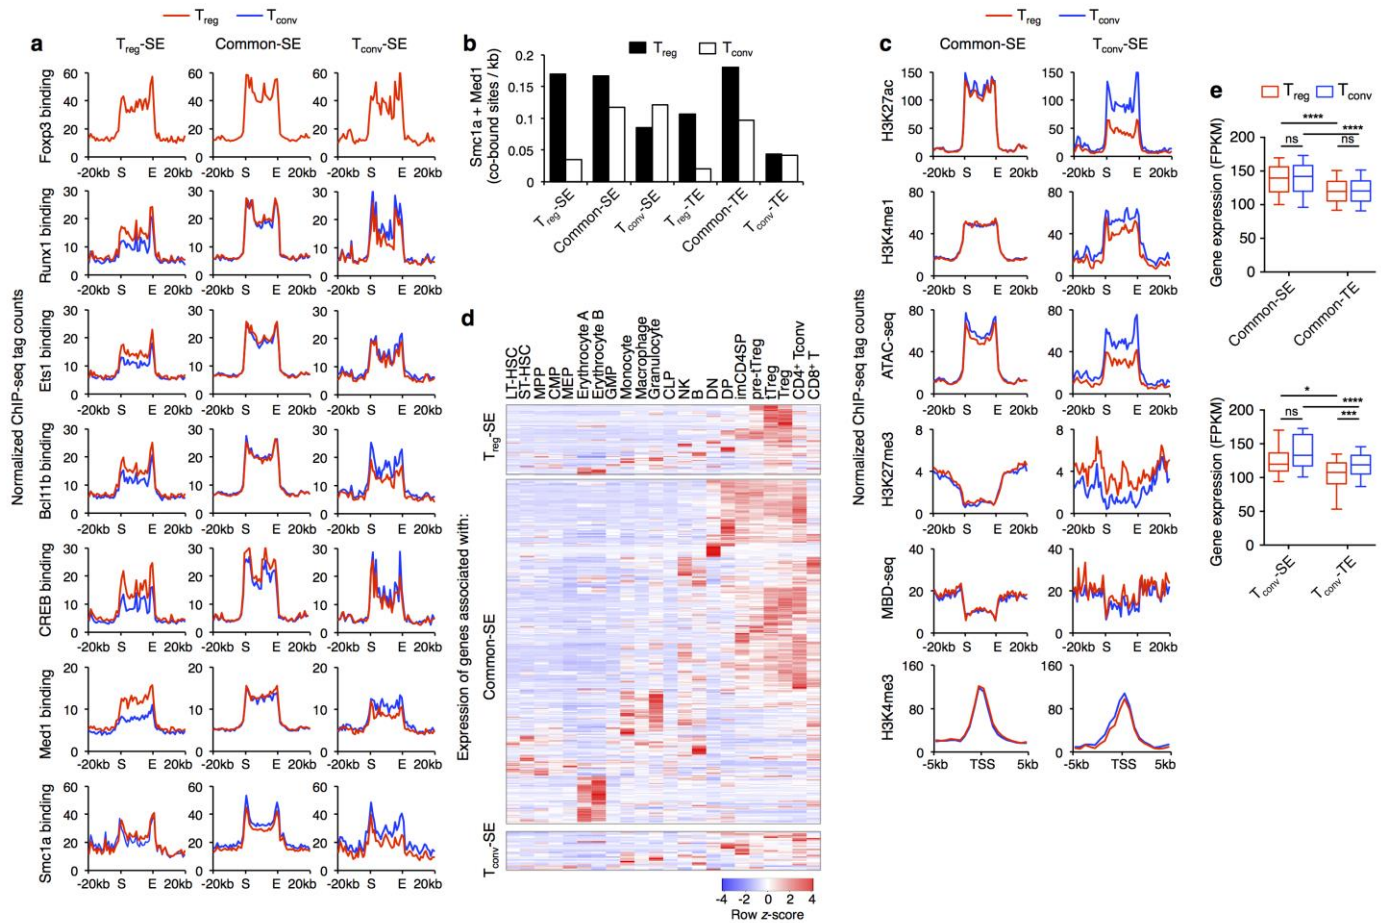

## Supplementary Figure 1

Characteristics of SEs in T<sub>reg</sub> and T<sub>conv</sub> cells.

**(a)** Patterns of indicated transcription factor-binding at SEs and surrounding regions in T<sub>reg</sub> and T<sub>conv</sub> cells. Average normalized ChIP-seq signals of global T<sub>reg</sub>-SEs, common-SEs or T<sub>conv</sub>-SEs were plotted for merged SE regions  $\pm$  20 kb. Merged ends of SEs are marked as S (start) and E (end). **(b)** Frequency of sites co-occupied by Smc1a and Med1 within indicated regions in T<sub>reg</sub> and T<sub>conv</sub> cells. **(c)** H3K27ac, H3K4me1 and H3K27me3, ATAC-seq, and MBD-seq signals at global common-SE and T<sub>conv</sub>-SE regions and H3K4me3 signal around transcription start sites (TSS) of common- or T<sub>conv</sub>-SE-associated genes in T<sub>reg</sub> and T<sub>conv</sub> cells. Average normalized ChIP-seq density of common- or T<sub>conv</sub>-SEs is plotted for merged SE regions  $\pm$  20 kb or TSS  $\pm$  5 kb. Merged ends of SEs are marked as S (start) and E (end). **(d)** Heatmap showing the expression of genes associated with T<sub>reg</sub>-SE, common-SE or T<sub>conv</sub>-SE in indicated immune cells. LT-HSC: long-term hematopoietic stem cell, ST-HSC: short-term hematopoietic stem cell, MPP: multipotent progenitor, CMP: common myeloid progenitor, MEP: megakaryocyte-erythrocyte progenitor, GMP: granulocyte-monocyte progenitor, and CLP: common lymphoid progenitor. **(e)** Expression of genes associated with common-SEs (334 genes) or -TEs (3516 genes) (left) and with T<sub>conv</sub>-SEs (19 genes) or -TEs (146 genes) (right) in T<sub>reg</sub> and T<sub>conv</sub> cells. Average of two independent RNA-seq experiments are plotted in box-and-whisker plot (median and 10-90 percentiles are shown). ns  $P > 0.05$ , \*  $P \leq 0.1$ , \*\*\*  $P \leq 0.001$ , and \*\*\*\*  $P \leq 0.0001$  (Kruskal-Wallis test, followed by Dunn's multiple comparisons test). Data are from one experiment (transcription factor ChIP-seq, ATAC-seq, H3K4me1 and H3K27me3 ChIP-seq), representative of two independent experiments (H3K27ac ChIP-seq, H3K4me3 ChIP-seq and MBD-seq) **(a-c)**, or are average of two independent experiments (RNA-seq) **(d,e)**.

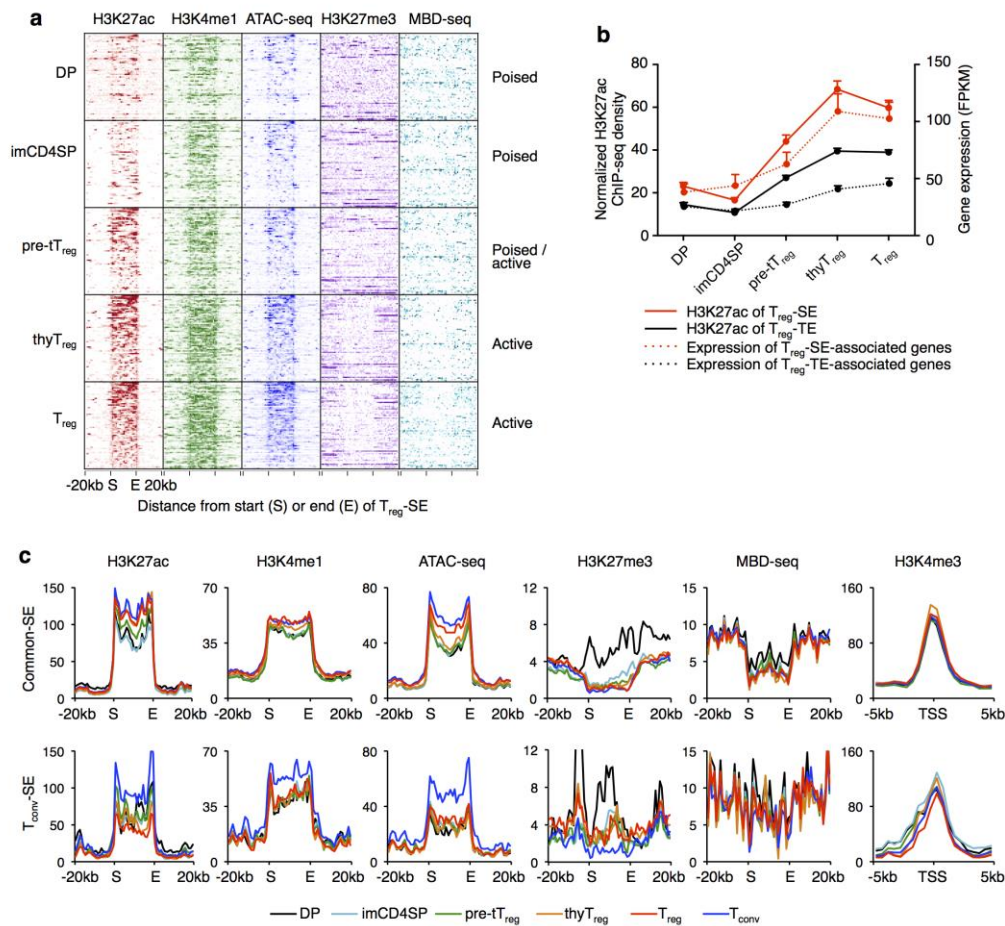

## Supplementary Figure 2

Chromatin configuration changes at SE regions in developing t<sub>reg</sub> cells.

(a) Heatmaps showing various epigenetic modifications at individual T<sub>reg</sub>-SE regions in DP, immature CD4SP (imCD4SP), t<sub>reg</sub> precursor (pre-t<sub>reg</sub>), thymic T<sub>reg</sub> (thyT<sub>reg</sub>) and peripheral T<sub>reg</sub> cells. Individual T<sub>reg</sub>-SEs (row) are listed in the same order in all sections and normalized ChIP-seq signals are shown for T<sub>reg</sub>-SE regions with merged ends ± 20 kb. Overall status of T<sub>reg</sub>-SEs suggested by combination of histone marks is indicated (right). (b) H3K27ac signals at T<sub>reg</sub>-SE and T<sub>reg</sub>-TE regions and associated gene expression during T<sub>reg</sub> cell development. Average of normalized ChIP-seq signals per kb at 66 T<sub>reg</sub>-SEs or average FPKM of associated genes (± SEM) are plotted. (c) H3K27ac, H3K4me1 and H3K27me3, ATAC-seq, and MBD-seq signals at global common-SE and T<sub>conv</sub>-SE regions and H3K4me3 signal around transcription start sites (TSS) of common- or T<sub>conv</sub>-SE-associated genes in indicated cells. Average normalized ChIP-seq density of common- or T<sub>conv</sub>-SEs is plotted for merged SE regions ± 20 kb or TSS ± 5 kb. Merged ends of SEs are marked as S (start) and E (end). Data in a–c are from one experiment (ATAC-seq, H3K4me1 and H3K27me3 ChIP-seq), representative of two independent experiments (H3K27ac ChIP-seq, H3K4me3 ChIP-seq and MBD-seq), or average of two independent experiments (RNA-seq).

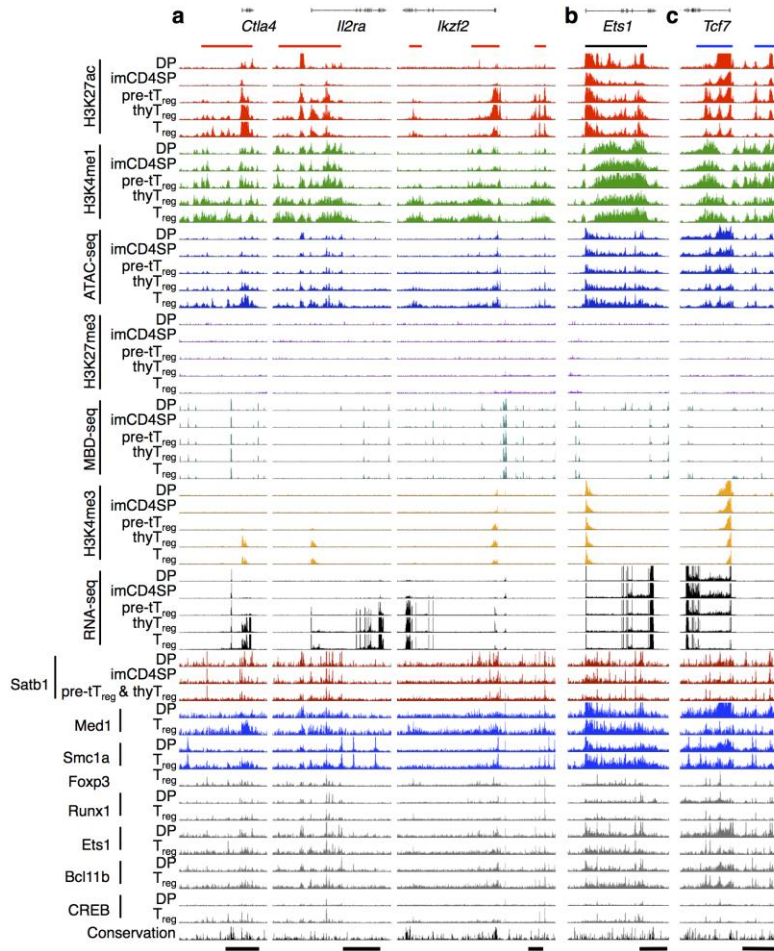

### Supplementary Figure 3

Establishment of individual SEs in developing tT<sub>reg</sub> cells.

(a-c) Changes in various epigenetic modifications, mRNA transcription and transcription factor binding during T<sub>reg</sub> cell development around representative T<sub>reg</sub>-SE regions at the *Ctla4*, *Ii2ra* and *Ikzf2* loci (a), common-SE region at the *Ets1* locus (b) and T<sub>conv</sub>-SE region at the *Tcf7* locus (c). H3K27ac, H3K4me1, H3K27me3, ATAC-seq, MBD-seq and RNA-seq signals in DP, immature CD4SP (imCD4SP), tT<sub>reg</sub> precursor (pre-tT<sub>reg</sub>), thymic T<sub>reg</sub> (thyT<sub>reg</sub>) and peripheral T<sub>reg</sub> cells, binding of various transcription factors in DP and T<sub>reg</sub> cells, and vertebrate conservation score are shown. Bars indicate 25 kb. Data are from one experiment (ATAC-seq, H3K4me1 and H3K27me3 ChIP-seq), representative of two independent experiments (H3K27ac ChIP-seq, H3K4me3 ChIP-seq and MBD-seq), or average of two independent experiments (RNA-seq).

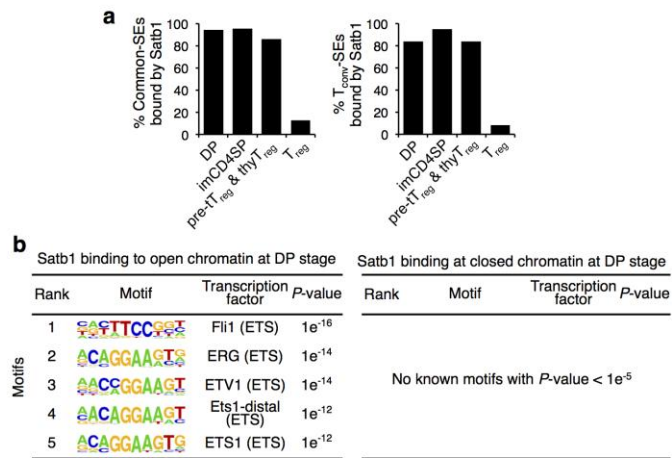

#### Supplementary Figure 4

Satb1 binding to SEs and transcription factor binding motifs of Satb1-binding sites at the DP stage.

(a) Percentage of common-SEs and T<sub>conv</sub>-SEs occupied by Satb1 in indicated cell populations. (b) Enrichment of transcription factor-binding motifs in Satb1-binding sites at open chromatin (left) and at closed chromatin (right) within T<sub>reg</sub>-SEs at the DP stage. Data are from one experiment (a,b).

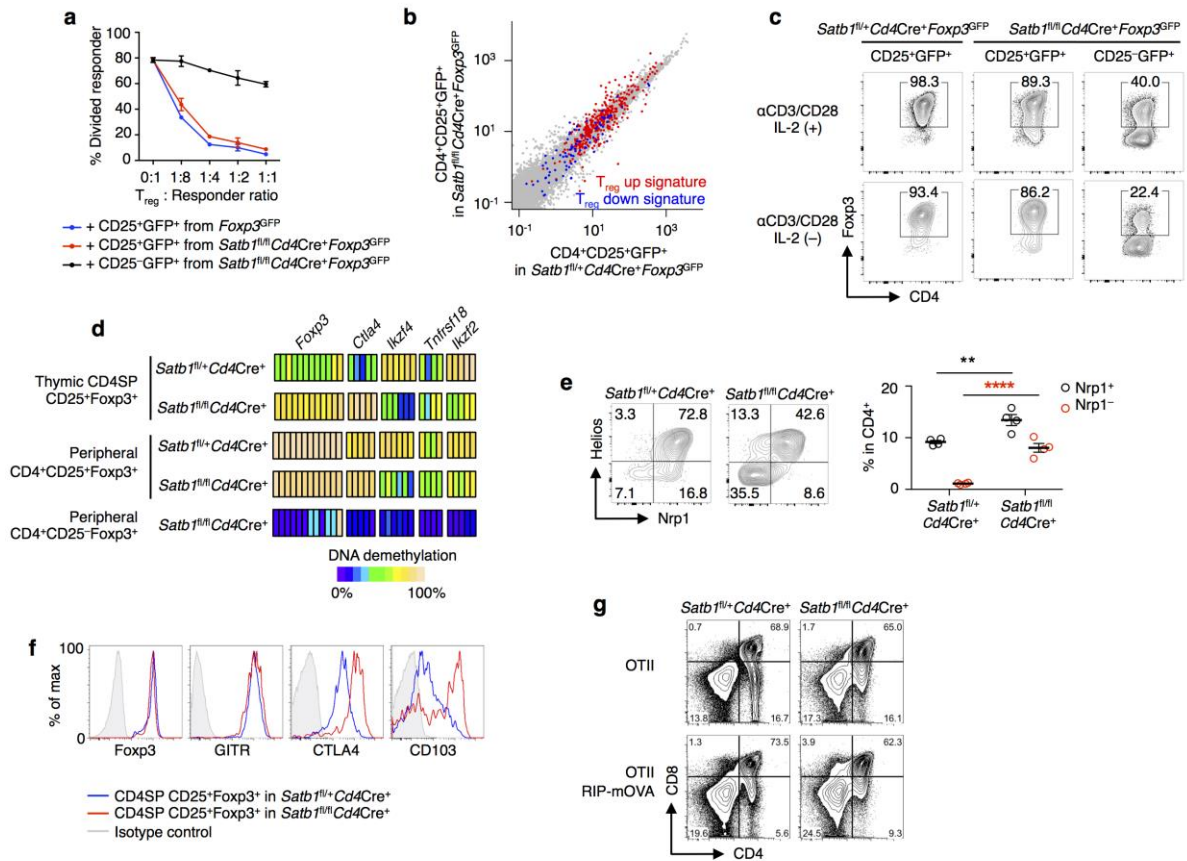

## Supplementary Figure 5

Effects of T cell-specific *Satb1* deletion on characteristics of T<sub>reg</sub> cells and on thymic negative selection.

(a) Suppressive function of peripheral CD4<sup>+</sup>CD25<sup>+</sup>GFP<sup>+</sup> cells from *Satb1*<sup>fl/+</sup>*Cd4*Cre<sup>+</sup>*Foxp3*<sup>GFP</sup> and CD4<sup>+</sup>CD25<sup>+</sup>GFP<sup>+</sup> and CD4<sup>+</sup>CD25<sup>-</sup>GFP<sup>+</sup> cells from *Satb1*<sup>fl/fl</sup>*Cd4*Cre<sup>+</sup>*Foxp3*<sup>GFP</sup> mice. Percentages of divided naive CD4<sup>+</sup> T cells when cultured at indicated ratio with T<sub>reg</sub> cells are shown (mean ± SEM). (b) Scatter plot displaying global gene expression in CD4<sup>+</sup>CD25<sup>+</sup>GFP<sup>+</sup> cells from *Satb1*<sup>fl/+</sup>*Cd4*Cre<sup>+</sup>*Foxp3*<sup>GFP</sup> and *Satb1*<sup>fl/fl</sup>*Cd4*Cre<sup>+</sup>*Foxp3*<sup>GFP</sup> mice. Average normalized fragments per kilobase of transcript per million reads mapped (FPKM) values from two independent RNA-seq experiments are plotted and T<sub>reg</sub> up and down signature genes are highlighted. (c) Flow cytometry of indicated cells after *in vitro* culture with TCR stimulation, with or without IL-2, for the expression of Fopx3. Numbers indicate percentages of Fopx3<sup>+</sup> cells in live CD4<sup>+</sup> T cells. (d) DNA methylation status of the T<sub>reg</sub> cell signature genes in thymic and peripheral CD4<sup>+</sup>CD25<sup>+</sup>Fopx3<sup>+</sup> T cells from *Satb1*<sup>fl/+</sup>*Cd4*Cre<sup>+</sup> and *Satb1*<sup>fl/fl</sup>*Cd4*Cre<sup>+</sup> mice, and peripheral CD4<sup>+</sup>CD25<sup>-</sup>Fopx3<sup>+</sup> T cells from *Satb1*<sup>fl/fl</sup>*Cd4*Cre<sup>+</sup> mice. (e) Flow cytometry of CD25<sup>+</sup>Fopx3<sup>+</sup> T<sub>reg</sub> cells from 4-week-old *Satb1*<sup>fl/+</sup>*Cd4*Cre<sup>+</sup> and *Satb1*<sup>fl/fl</sup>*Cd4*Cre<sup>+</sup> mice for the expression of Nrp1 and Helios, and summary graph showing the percentages of Nrp1<sup>+</sup>CD25<sup>+</sup>Fopx3<sup>+</sup> and Nrp1<sup>-</sup>CD25<sup>+</sup>Fopx3<sup>+</sup> cells among CD4<sup>+</sup> T cells (mean ± SEM, n = 4). \*\* P ≤ 0.01 and \*\*\*\* P ≤ 0.0001 (two-way ANOVA, followed by Holm-Sidak's multiple comparison test). (f) Flow cytometry of CD25<sup>+</sup>Fopx3<sup>+</sup> CD4SP cells found in the thymus of 4-week-old *Satb1*<sup>fl/+</sup>*Cd4*Cre<sup>+</sup> and *Satb1*<sup>fl/fl</sup>*Cd4*Cre<sup>+</sup> mice, for the expression of T<sub>reg</sub> cell signature and activation-associated molecules. (g) Flow cytometry of Va2<sup>+</sup> thymocytes from *Satb1*<sup>fl/+</sup>*Cd4*Cre<sup>+</sup>OTII, *Satb1*<sup>fl/+</sup>*Cd4*Cre<sup>+</sup>OTII-RIP-mOVA, *Satb1*<sup>fl/fl</sup>*Cd4*Cre<sup>+</sup>OTII, and *Satb1*<sup>fl/fl</sup>*Cd4*Cre<sup>+</sup>OTII-RIP-mOVA mice, for the examination of CD4SP thymocyte percentage. Data are representative or summary of three independent experiments with three or more mice (a, c-f), of two experiments with two mice (b), and of four experiments with four or more mice (g).

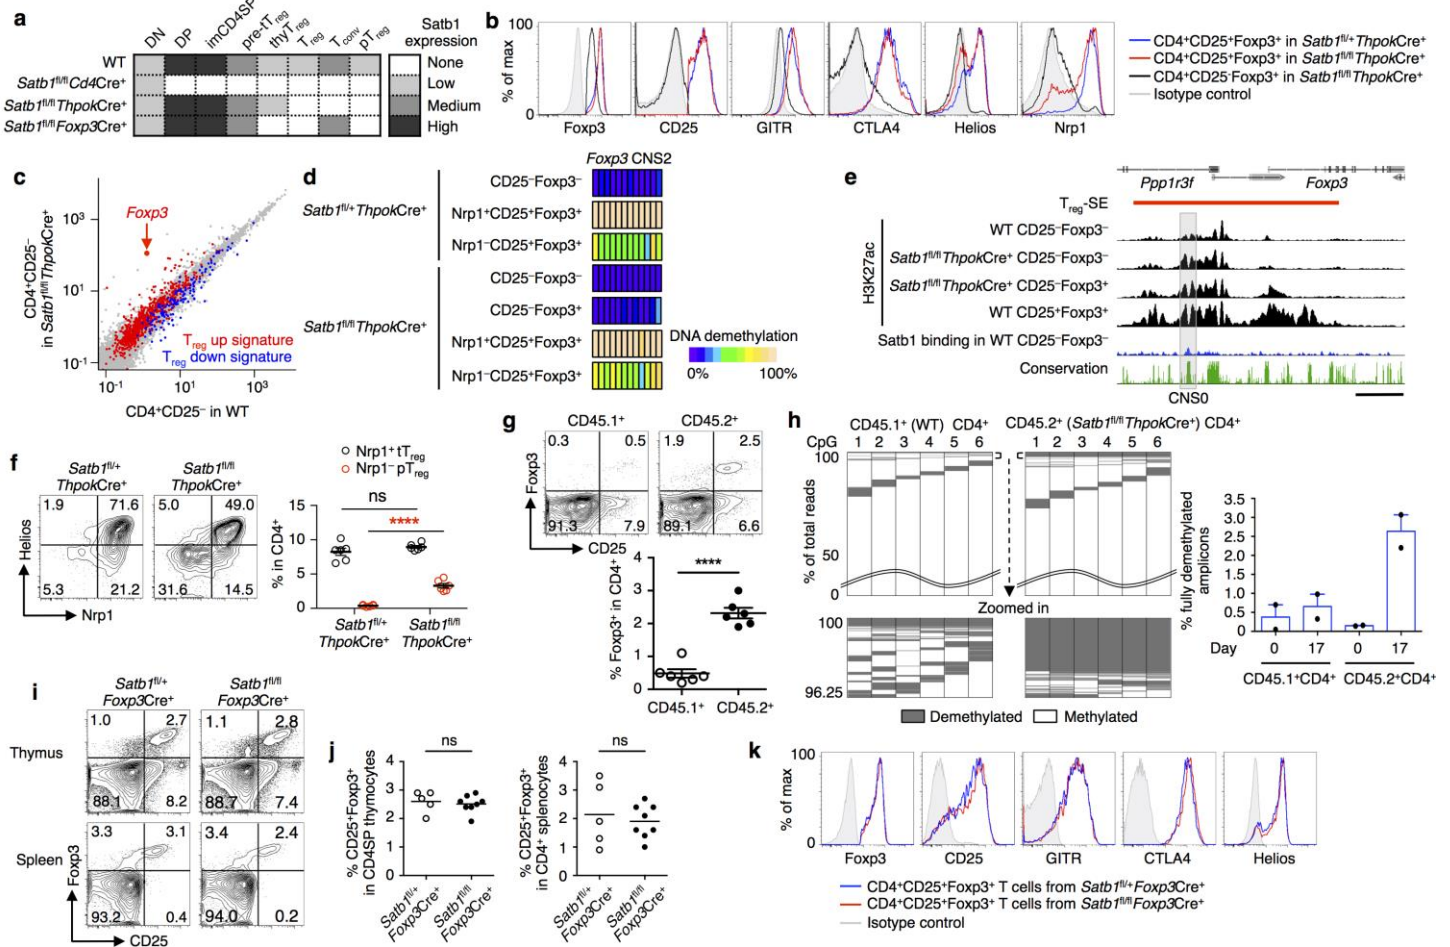

## Supplementary Figure 6

Effects of mature CD4<sup>+</sup> T cell-specific and T<sub>reg</sub>-specific *Satb1* deletion on T<sub>reg</sub> development, phenotype and T<sub>reg</sub>-type DNA hypomethylation.

(a) Schematic diagram illustrating the timing of *Satb1* deletion in *Satb1<sup>fl/fl</sup>Cd4Cre<sup>+</sup>*, *Satb1<sup>fl/fl</sup>ThpokCre<sup>+</sup>*, and *Satb1<sup>fl/fl</sup>Foxp3Cre<sup>+</sup>* mice. *Satb1* expression level is indicated by color code. (b) Flow cytometry of peripheral CD4<sup>+</sup>CD25<sup>+</sup>Foxp3<sup>+</sup> T cells from *Satb1<sup>fl/fl</sup>ThpokCre<sup>+</sup>* and *Satb1<sup>fl/fl</sup>ThpokCre<sup>+</sup>* mice, and CD4<sup>+</sup>CD25<sup>-</sup>Foxp3<sup>+</sup> T cells from *Satb1<sup>fl/fl</sup>ThpokCre<sup>+</sup>* mice, for the expression of T<sub>reg</sub> cell signature molecules. (c) Scatter plot displaying global gene expression in CD4<sup>+</sup>CD25<sup>-</sup> cells from wild-type (WT) and *Satb1<sup>fl/fl</sup>ThpokCre<sup>+</sup>* mice. Average normalized fragments per kilobase of transcript per million reads mapped (FPKM) values from two independent RNA-seq experiments are plotted and T<sub>reg</sub> up and down signature genes are highlighted. (d) DNA methylation status of the *Foxp3* CNS2 region in peripheral CD4<sup>+</sup>CD25<sup>-</sup>Foxp3<sup>+</sup>, CD4<sup>+</sup>CD25<sup>+</sup>Foxp3<sup>+</sup>Nrp1<sup>+</sup> and CD4<sup>+</sup>CD25<sup>+</sup>Foxp3<sup>+</sup>Nrp1<sup>-</sup> cells from *Satb1<sup>fl/fl</sup>ThpokCre<sup>+</sup>* and *Satb1<sup>fl/fl</sup>ThpokCre<sup>+</sup>* mice, and CD4<sup>+</sup>CD25<sup>-</sup>Foxp3<sup>+</sup> from *Satb1<sup>fl/fl</sup>ThpokCre<sup>+</sup>* mice. Each block indicates CpG residues within amplicons. (e) H3K27ac modification in indicated cell types and *Satb1* binding in WT T<sub>conv</sub> cells at the *Foxp3* locus. Vertebrate conservation score and CNS0 region are shown. Bar indicates 5 kb. (f) Flow cytometry of peripheral CD25<sup>+</sup>Foxp3<sup>+</sup> T cells in *Satb1<sup>fl/fl</sup>ThpokCre<sup>+</sup>* and *Satb1<sup>fl/fl</sup>ThpokCre<sup>+</sup>* mice, for the expression of Nrp1 and Helios, and summary data showing the percentages of Nrp1<sup>+</sup> tT<sub>reg</sub> and Nrp1<sup>-</sup> pT<sub>reg</sub> cells in peripheral CD4<sup>+</sup> T cells (mean ± SEM, n = 6). ns *P* > 0.05 and \*\*\*\* *P* ≤ 0.0001 (two-way ANOVA, followed by Holm-Sidak's multiple comparison test). (g) Flow cytometry of CD45.1<sup>+</sup> and CD45.2<sup>+</sup> CD4<sup>+</sup> T cells from WT (CD45.1<sup>+</sup>) and *Satb1<sup>fl/fl</sup>ThpokCre<sup>+</sup>* (CD45.2<sup>+</sup>) mice, for identification of T<sub>reg</sub> cells by CD25 and Foxp3 expression. Summary graph shows percentages of Foxp3<sup>+</sup> cells among CD45.1<sup>+</sup> or CD45.2<sup>+</sup> T cells (n = 6, mean ± SEM). \*\*\*\* *P* ≤ 0.0001 (two-tailed t-test). (h) DNA methylation status of 6 CpG residues within the *Foxp3* CNS2 in WT and *Satb1*-deficient CD4<sup>+</sup> T cells isolated on day 17 in the experiment described in **g**. CpGs from 5' end are numbered as 1-6 (column) and amplicons are ordered from the most demethylated ones (row). Demethylated or methylated status is indicated by color code. 0-50% of fully methylated amplicons are omitted for presentation, as the wavy lines indicate (upper panel). Top 3.75% of total reads, when ordered from the most demethylated clones, are zoomed in (bottom). Summary data of two independent experiments, showing the percentage of fully demethylated amplicons, are also shown (right). (i) Flow cytometry of CD4SP thymocytes and CD4<sup>+</sup> splenocytes from 4-day-old *Satb1<sup>fl/fl</sup>Foxp3Cre<sup>+</sup>* and *Satb1<sup>fl/fl</sup>Foxp3Cre<sup>+</sup>* mice, for identification of T<sub>reg</sub> cells by the expression of Foxp3 and CD25. (j) Percentages of

CD25<sup>+</sup>Foxp3<sup>+</sup> T<sub>reg</sub> cells among CD4SP thymocytes and CD4<sup>+</sup> splenocytes in 4-day-old *Satb1*<sup>fl/+</sup>*Foxp3*Cre<sup>+</sup> (n = 5) and *Satb1*<sup>fl/fl</sup>*Foxp3*Cre<sup>+</sup> mice (n = 8). Horizontal line indicates mean. ns *P* > 0.05 (two-tailed t-test). **(k)** Flow cytometry of peripheral CD4<sup>+</sup>CD25<sup>+</sup>Foxp3<sup>+</sup> T<sub>reg</sub> cells from 4-week-old *Satb1*<sup>fl/+</sup>*Foxp3*Cre<sup>+</sup> and *Satb1*<sup>fl/fl</sup>*Foxp3*Cre<sup>+</sup> mice, for T<sub>reg</sub> cell signature molecule expression. Data are representative or summary of three independent experiments with three or more mice **(b,d,f,g,i-k)**, average of two independent RNA-seq experiments **(c)**, representative of two independent experiments **(e)**, or representative and summary of two independent experiments **(h)**.

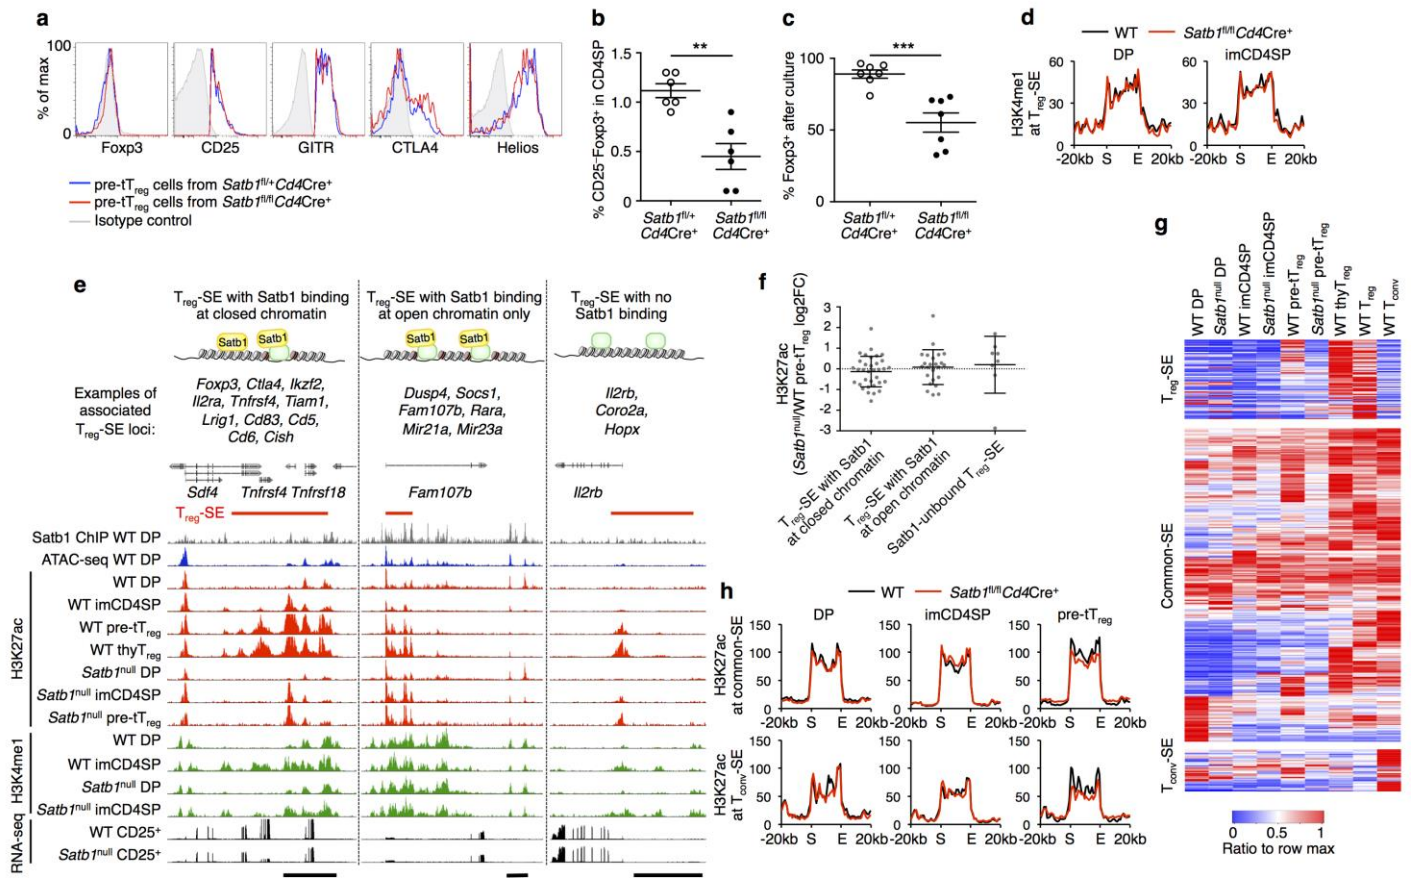

### Supplementary Figure 7

Phenotypic and epigenetic characteristics of *Satb1*-deficient tT<sub>reg</sub> precursor cells.

(a) Flow cytometry of tT<sub>reg</sub> precursor (pre-tT<sub>reg</sub>) cells from *Satb1*<sup>fl/+</sup>*Cd4Cre*<sup>+</sup> and *Satb1*<sup>fl/fl</sup>*Cd4Cre*<sup>+</sup> mice, for the expression of T<sub>reg</sub> cell signature molecules. (b) Percentages of CD25<sup>+</sup>Foxp3<sup>+</sup> CD4SP thymocytes in 4-week-old *Satb1*<sup>fl/+</sup>*Cd4Cre*<sup>+</sup> and *Satb1*<sup>fl/fl</sup>*Cd4Cre*<sup>+</sup> mice. \*\* *P* ≤ 0.01 (two-tailed t-test). (c) Percentages of Fopx3<sup>+</sup> cells after TCR and IL-2 stimulation of cells in b. \*\*\* *P* ≤ 0.001 (two-tailed t-test). (d) H3K4me1 signals at global T<sub>reg</sub>-SE regions in DP and immature CD4SP (imCD4SP) thymocytes from wild-type (WT) and *Satb1*<sup>fl/fl</sup>*Cd4Cre*<sup>+</sup> mice. Average normalized CHIP-seq density of T<sub>reg</sub>-SEs is plotted for merged T<sub>reg</sub>-SE regions ± 20 kb. Merged ends of T<sub>reg</sub>-SEs are marked as S (start) and E (end). (e) Categorization of T<sub>reg</sub>-SEs by the chromatin state of initial Satb1 binding at the DP stage and effects of Satb1 deletion on their activation. T<sub>reg</sub>-SEs are divided into those with at least one Satb1-binding site at closed chromatin (left), with Satb1-binding sites at open chromatin only (middle), or with no Satb1 binding at the DP stage. Schematic diagram illustrating the categorization by Satb1 binding type (top panel), examples of T<sub>reg</sub>-SE loci (middle panel) and H3K27ac, H3K4me1 and gene transcription at representative T<sub>reg</sub>-SE during T<sub>reg</sub> cell development in WT and *Satb1*<sup>fl/fl</sup>*Cd4Cre*<sup>+</sup> mice (bottom) are shown for each category. Bars indicate 10 kb. (f) Summary data showing the effects of Satb1 deletion on T<sub>reg</sub>-SEs categorized in e, shown as log2 fold-change (log2FC) of H3K27ac signal at T<sub>reg</sub>-SEs between pre-tT<sub>reg</sub> cells of WT and *Satb1*<sup>fl/fl</sup>*Cd4Cre*<sup>+</sup> mice (mean ± SEM). Dots indicate individual T<sub>reg</sub>-SEs. (g) Heatmap showing relative H3K27ac signals at individual T<sub>reg</sub>-SE, common-SE, and T<sub>conv</sub>-SE regions in indicated cell populations. Ratio to the maximum value among the listed cell populations is shown. (h) H3K27ac signals at global common-SE and T<sub>conv</sub>-SE regions in DP, imCD4SP and pre-tT<sub>reg</sub> cells from WT and *Satb1*<sup>fl/fl</sup>*Cd4Cre*<sup>+</sup> mice. Average normalized CHIP-seq density of common-SEs or T<sub>conv</sub>-SEs is plotted for merged SE regions ± 20 kb. Merged ends of SEs are marked as S (start) and E (end). Data are representative of three independent experiments with three or more mice (a-c), from one experiment (d), or representative of two independent experiments (e-h).



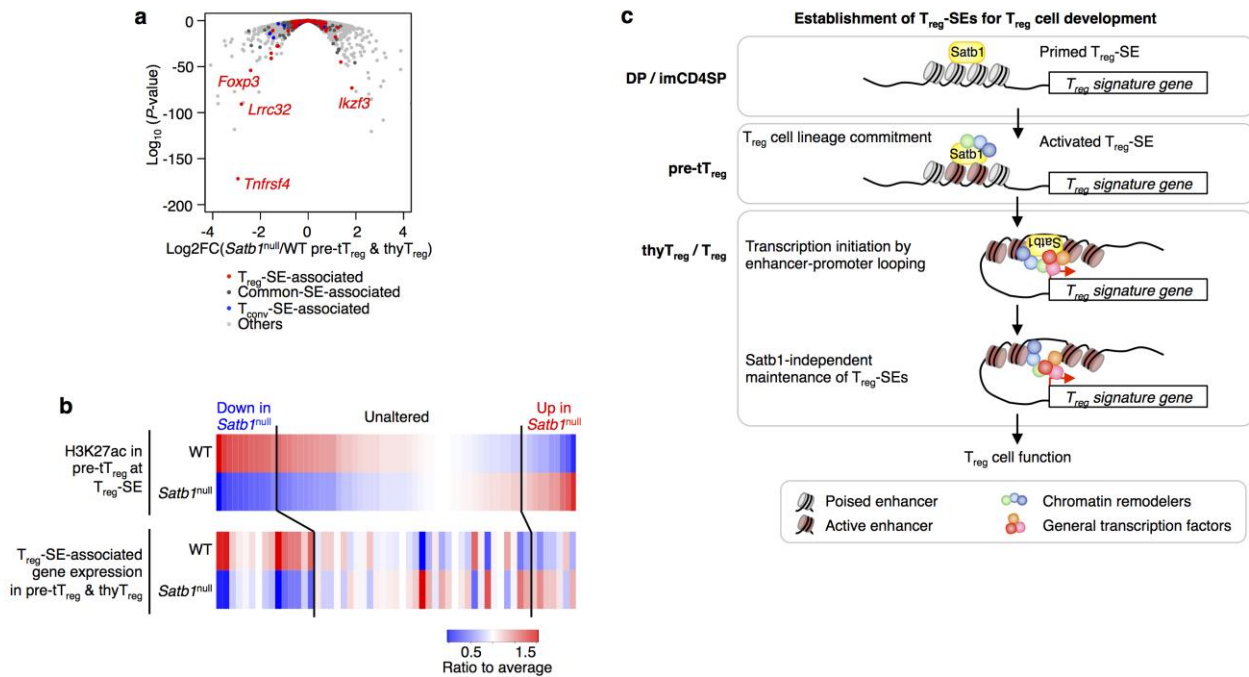

## Supplementary Figure 8

Effects of Satb1-dependent T<sub>reg</sub>-SE activation on associated gene expression.

(a) Volcano plot showing the differential gene expression between wild-type (WT) and *Satb1*<sup>fl/fl</sup> *Cd4Cre*<sup>+</sup> CD24<sup>+</sup>CD25<sup>+</sup>GITR<sup>+</sup> CD4SP thymocytes (mixture of immature thymic T<sub>reg</sub> (thyT<sub>reg</sub>) and t<sub>reg</sub> precursor (pre-t<sub>reg</sub>) cells). Genes associated with T<sub>reg</sub>-SEs, common-SEs and T<sub>conv</sub>-SEs are highlighted. (b) H3K27ac of individual T<sub>reg</sub>-SE regions at the pre-t<sub>reg</sub> cell stage (top) and associated gene expression in CD24<sup>+</sup>CD25<sup>+</sup>GITR<sup>+</sup> CD4SP thymocytes (bottom) in WT and *Satb1*<sup>fl/fl</sup> *Cd4Cre*<sup>+</sup> mice, shown as ratios to the average of two populations. T<sub>reg</sub>-SEs are grouped into three categories by the effects of Satb1 deletion, as shown in Fig. 8e. (c) Hypothetical model of super-enhancer establishment and subsequent transcriptional regulation during thymic T<sub>reg</sub> cell development. T<sub>reg</sub>-SE regions are poised at least from the DP stage and bound by Satb1. Upon receiving the signal to direct T<sub>reg</sub> cell differentiation, T<sub>reg</sub>-SE regions undergo Satb1-dependent activation, likely through the recruitment of epigenetic modifying enzymes, and become T<sub>reg</sub> lineage-committed precursor cells. As T<sub>reg</sub> cell development proceeds, enhancer-promoter looping facilitates the expression of associated T<sub>reg</sub> cell signature genes, including *Foxp3*, as well as other epigenetic modifications such as T<sub>reg</sub>-specific DNA demethylation, histone modification of promoter regions and chromatin loosening of enhancer and promoter regions. Once T<sub>reg</sub> cell development is complete, *Foxp3* amplifies pre-established molecular features<sup>1</sup> and *Satb1* transcription is repressed by *Foxp3*<sup>2</sup>; however, mediator, cohesin, and various transcription factors, including *Foxp3*, occupy the sites where *Satb1* initially bound, maintaining the local chromatin structure.

1. Gavin, M.A. *et al.* Foxp3-dependent programme of regulatory T-cell differentiation. *Nature* **445**, 771–775 (2007).

2. Beyer, M. *et al.* Repression of the genome organizer SATB1 in regulatory T cells is required for suppressive function and inhibition of effector differentiation. *Nature immunology* **12**, 898–907 (2011).
